# Supplementary material
Source: PubMed Central journal article supplement (PMC4793939)

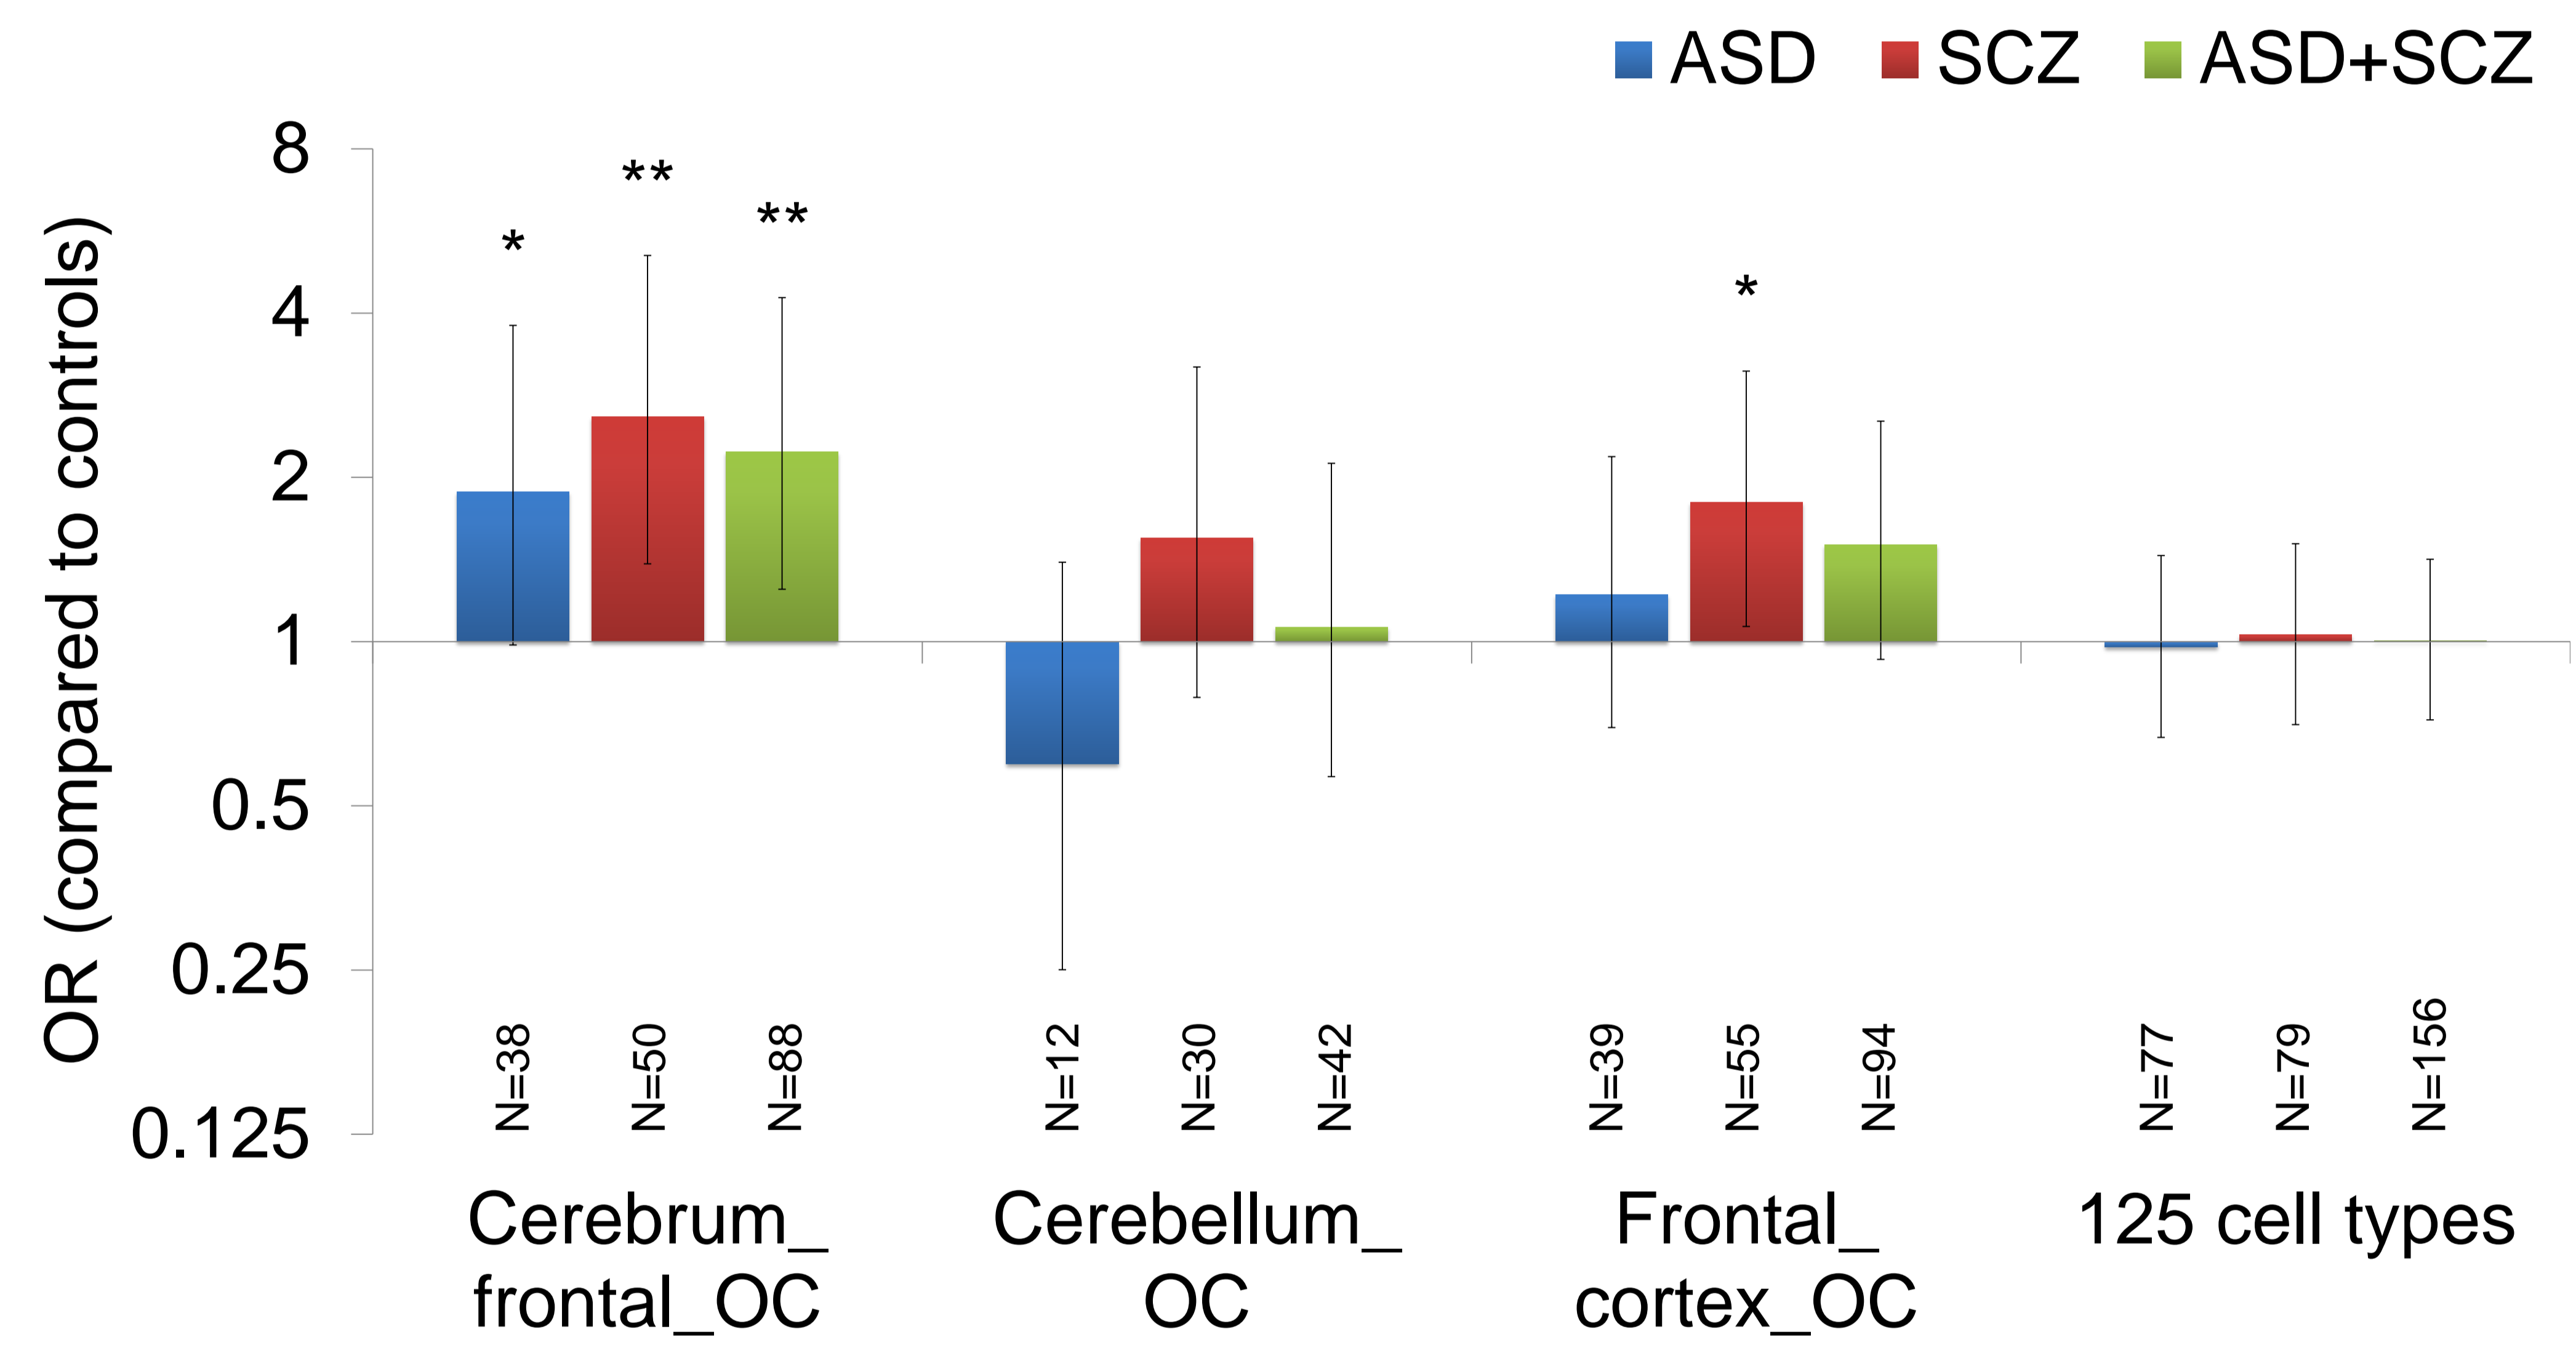

Supplement: NIHMS764213-supplement-1.pdf [file NIHMS764213-supplement-1.pdf]

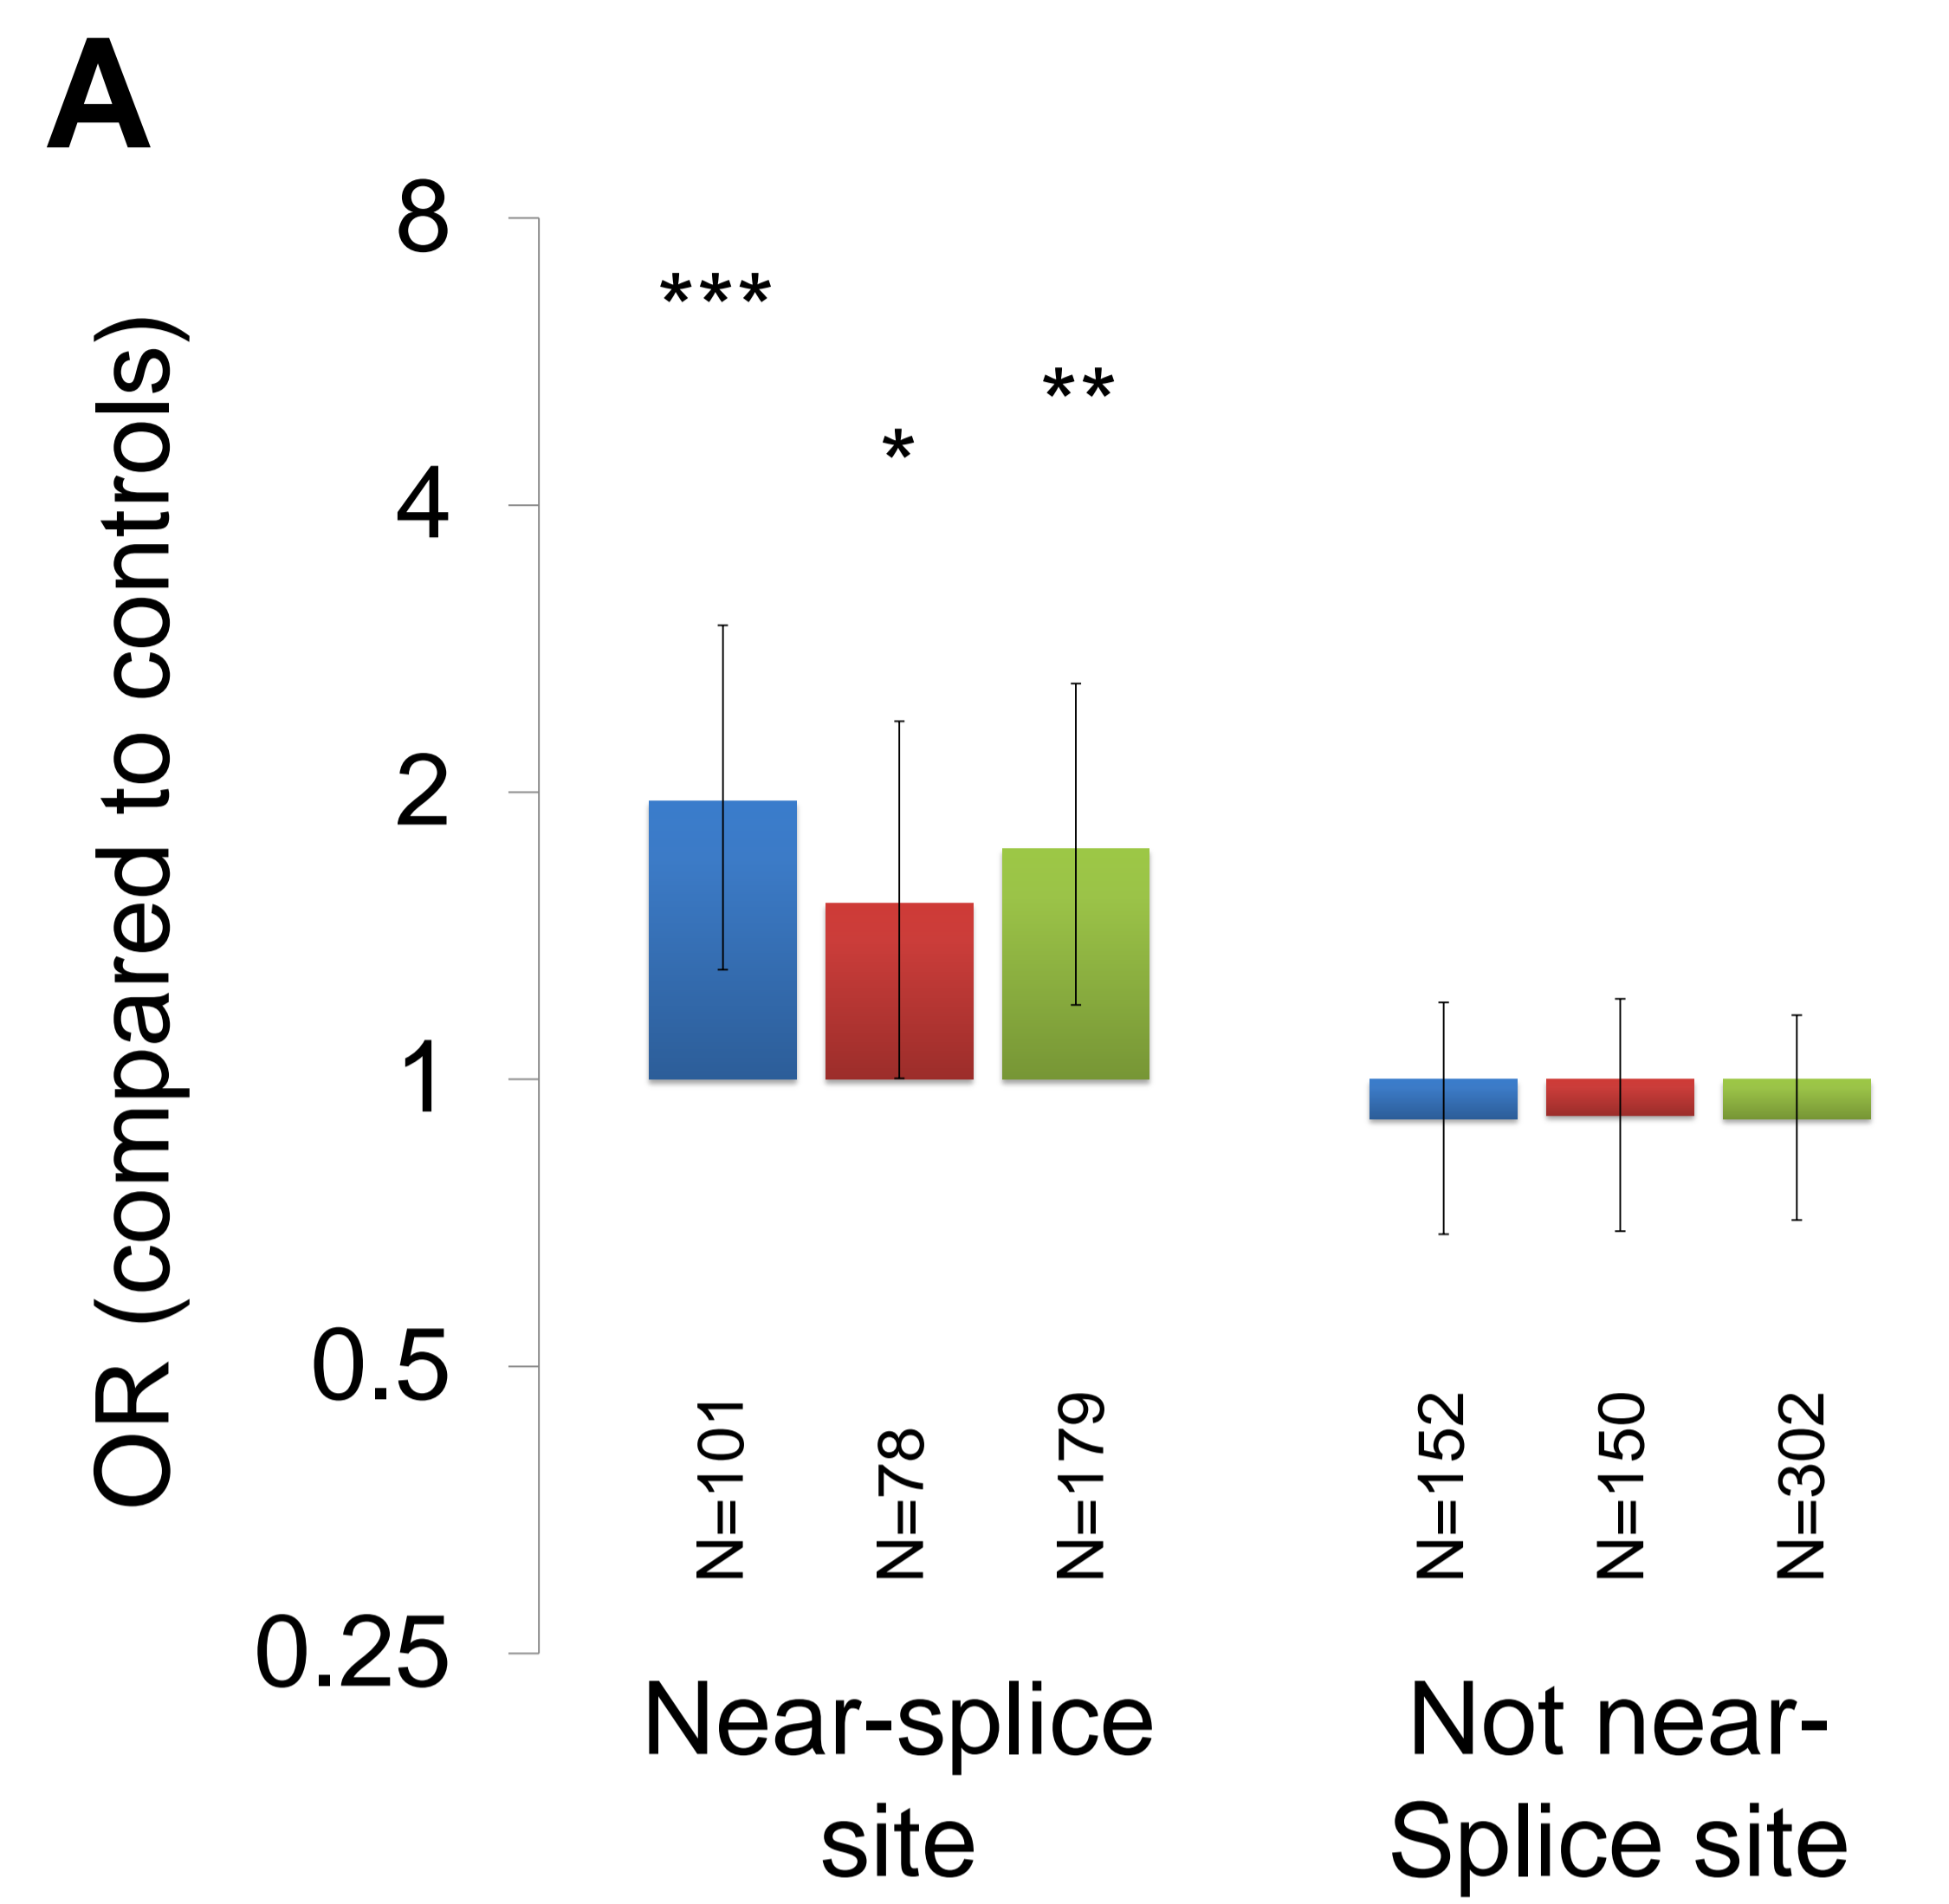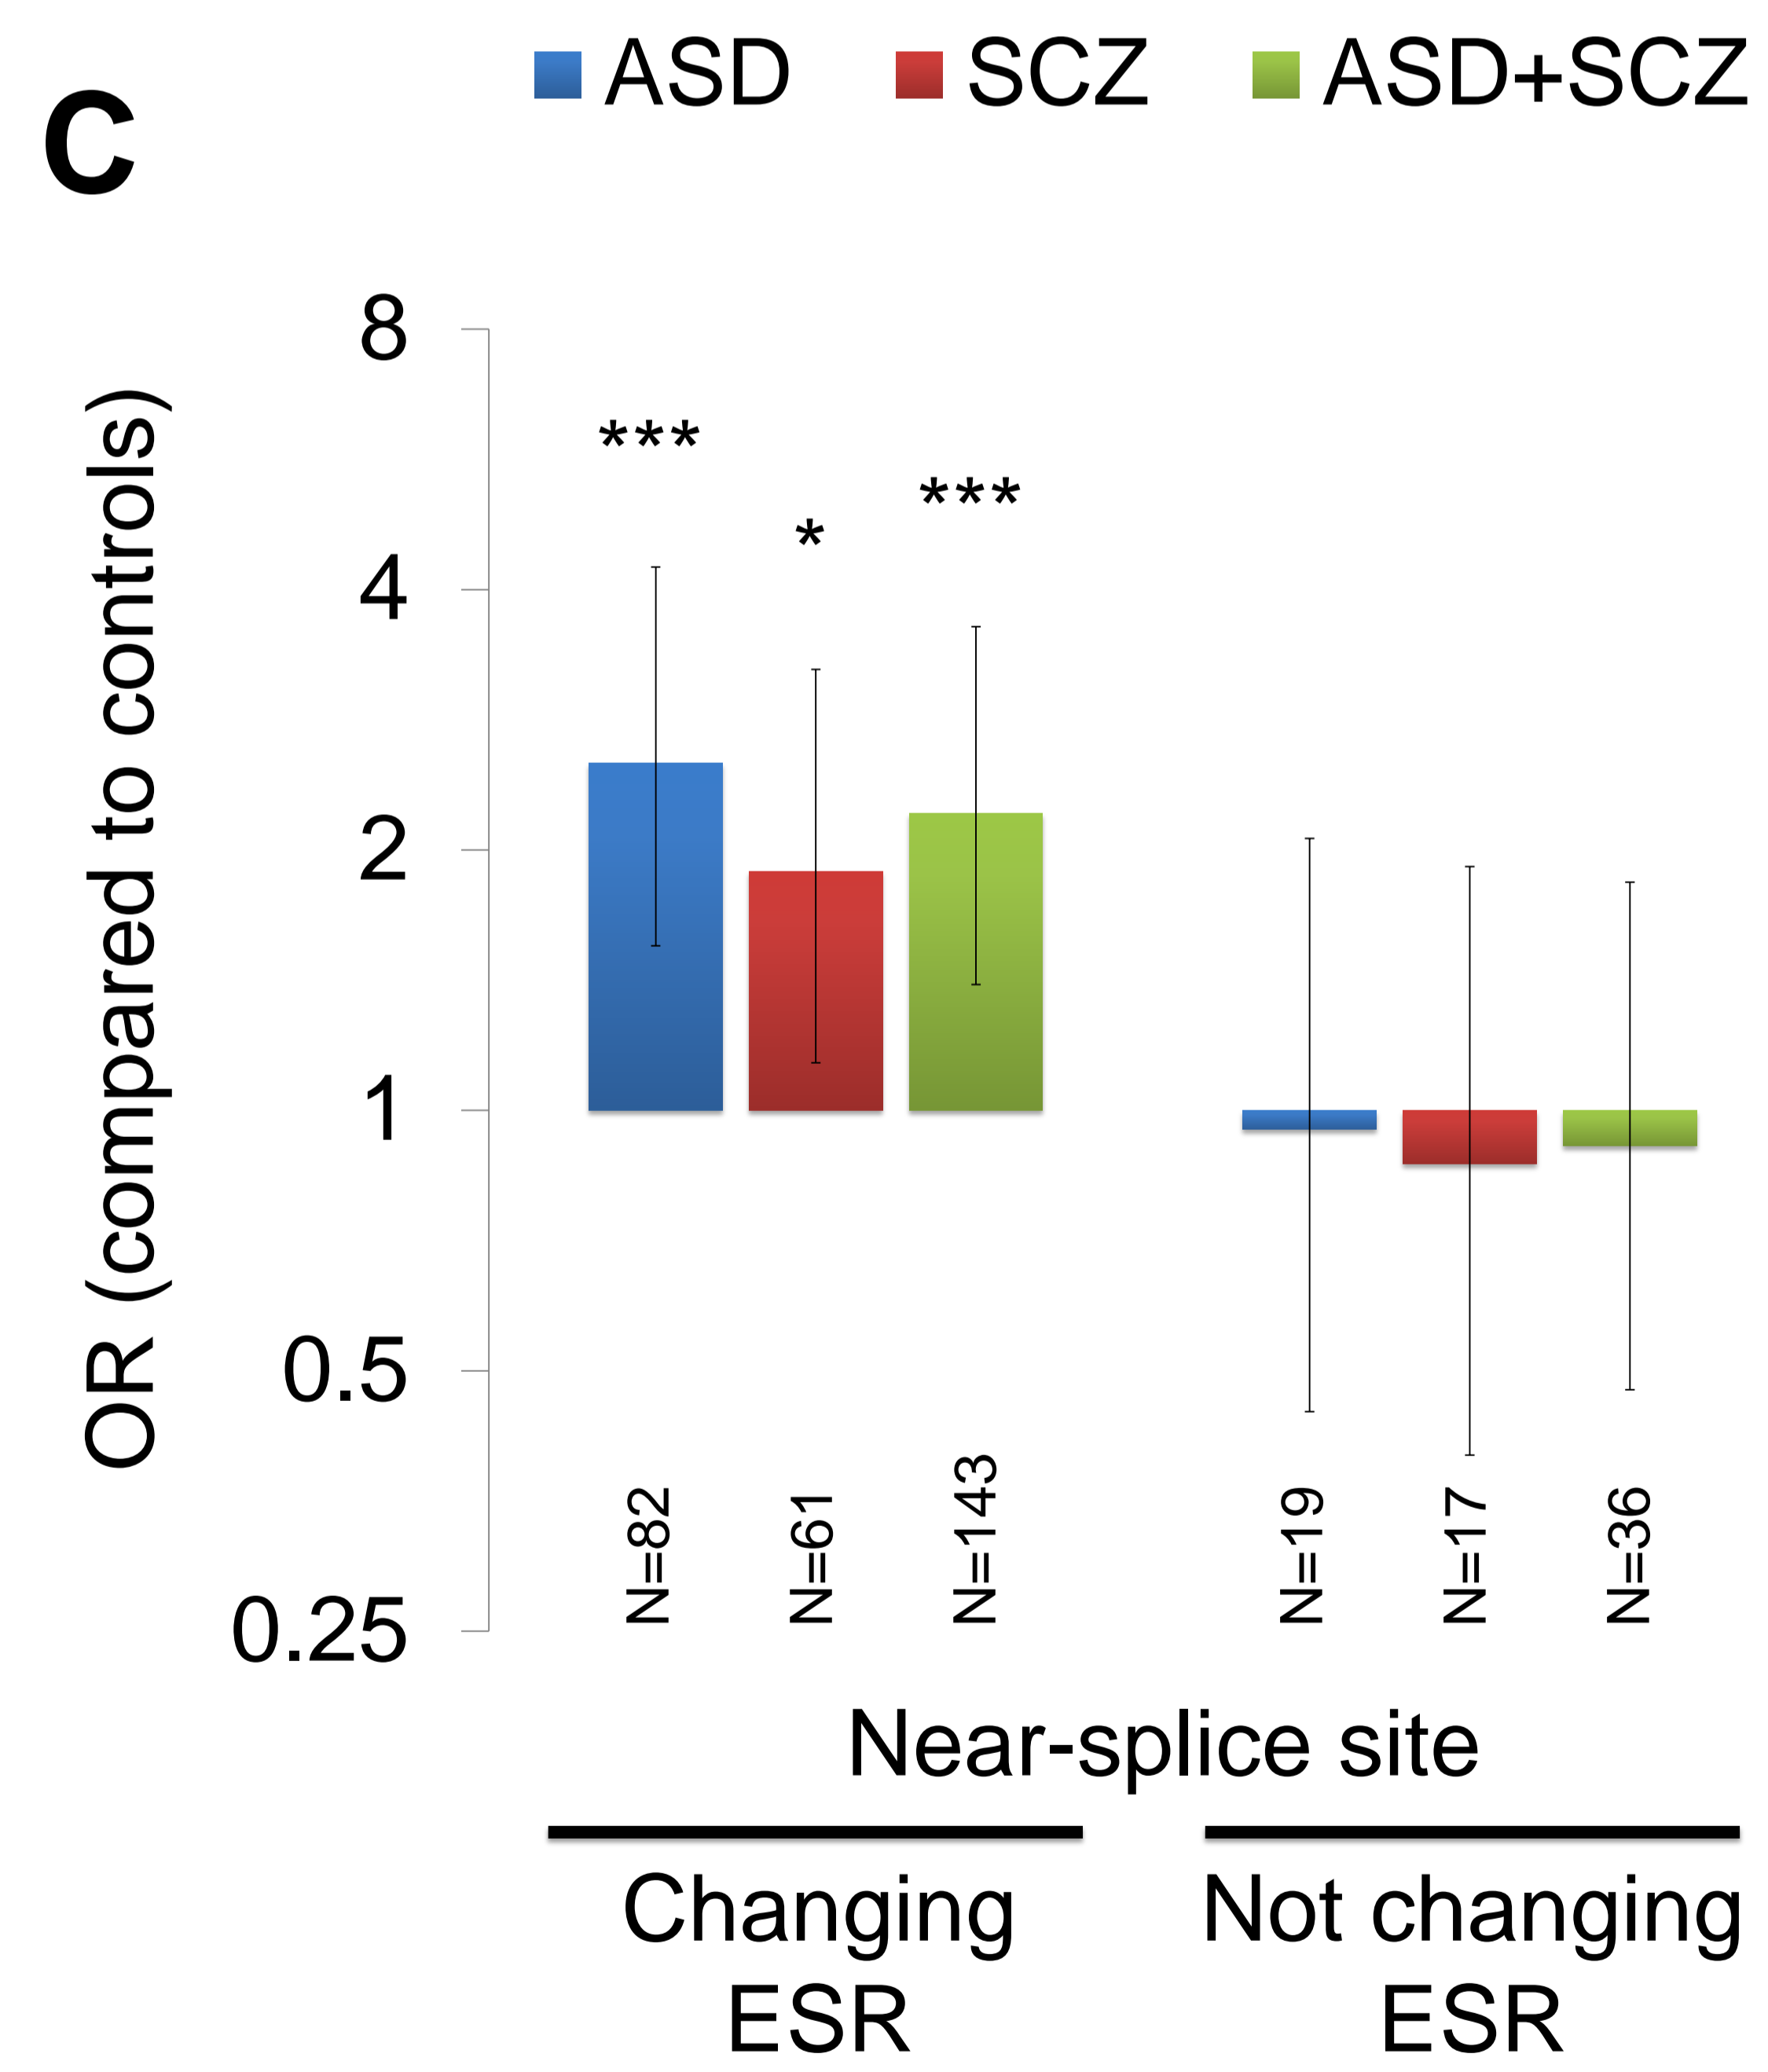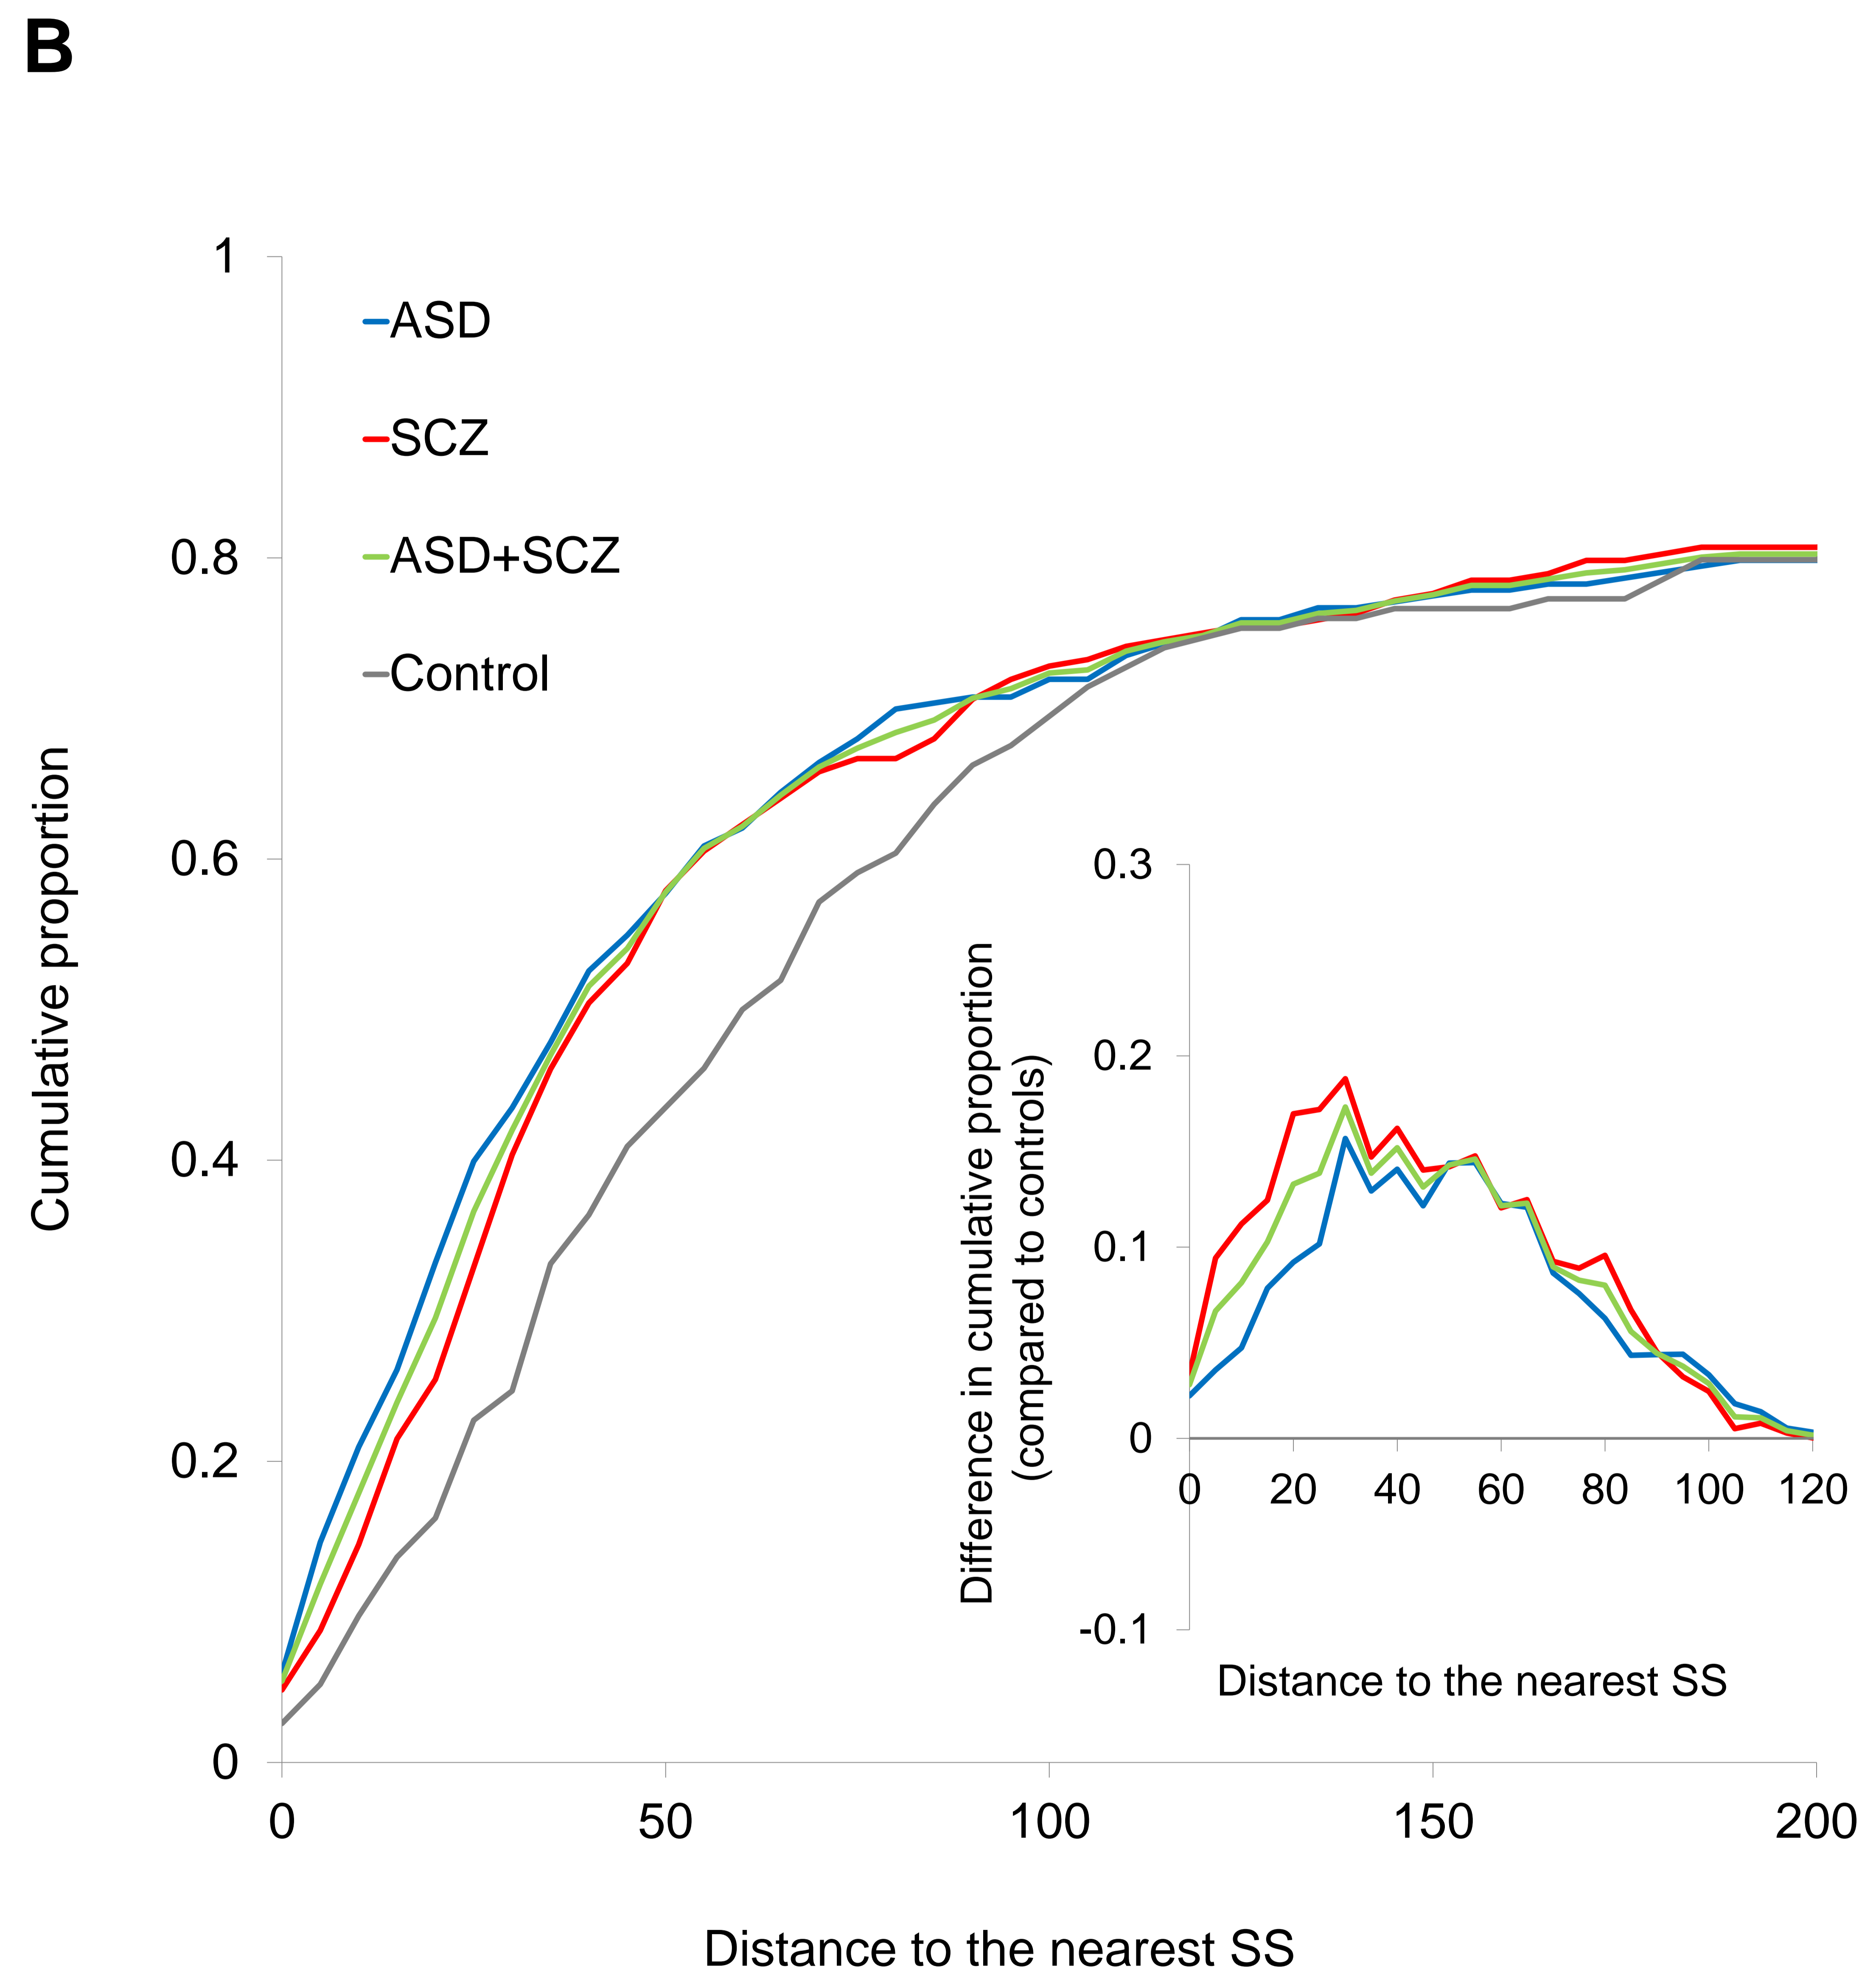

Supplement: NIHMS764213-supplement-3.pdf [file NIHMS764213-supplement-3.pdf]
